# Supplementary material for: Enhanced control of plasmonic properties of silver–gold hollow nanoparticles via a reduction-assisted galvanic replacement approach
Source: Royal Society of Chemistry journal article supplement (doi:10.1039/c8ra09364d), 2019-01-01
Supplement: c8ra09364d1.pdf [file c8ra09364d1.pdf]

Electronic Supporting Information for:

## **Enhanced Control of Plasmonic Properties of Silver-Gold Hollow Nanoparticles Via a Reduction-Assisted Galvanic Replacement Approach**

Josée R. Daniel,<sup>a</sup> Lauren A. McCarthy,<sup>b</sup> Emilie Ringe<sup>b,c,d‡</sup> and Denis Boudreau<sup>a‡</sup>

<sup>a</sup> Département de chimie et Centre d'optique, photonique et laser (COPL), Université Laval, Québec (QC),  
G1V 0A6, Canada.

<sup>b</sup> Department of Chemistry, Rice University, Houston, Texas, 77005, USA.

<sup>c</sup> Department of Materials Science and Metallurgy, University of Cambridge, 27 Charles Babbage Road,  
Cambridge, CB3 0FS, UK.

<sup>d</sup> Department of Earth Sciences, University of Cambridge, Downing Street, Cambridge, CB2 3EQ, UK

<sup>‡</sup>Corresponding authors: E.R.: er407@cam.ac.uk, D.B: denis.boudreau@chm.ulaval.ca

Table S1. Experimental details for the synthesis of spherical Ag cores (masses are given per 100 mL).

| Ag Size (nm) | Tannic Acid (mg) | Citrate (mg) | Centrifuge Ag |     | Centrifuge AgAu |     |
|--------------|------------------|--------------|---------------|-----|-----------------|-----|
|              |                  |              | RCF           | min | RCF             | min |
| 55-60        | 50               | 72           | 7500          | 12  | 7500            | 5   |
| 70-75        | 30               | 15           | 6000          | 10  | 6000            | 5   |
| 85-90        | 38               | 10           | 6000          | 8   | 5000            | 5   |
| 110-120      | 60               | 9            | 4500          | 9   | 4500            | 5   |

Table S2. FWHM for AgAu hollow nanoparticles as a function of Au concentration. The bulk measurements are related to Fig. 1A, while single particle measurements are related to Fig. 1B-F as noted in the LSPR (nm) column.

| Au éq.    | Bulk FWHM (nm) | SP FWHM (nm) |
|-----------|----------------|--------------|
| Ag        | 135            | 73 ± 7       |
| 0.25Au:Ag | 215            | 110 ± 17     |
| 0.50Au:Ag | 200            | 108 ± 10     |
| 0.75Au:Ag | 195            | 122 ± 15     |
| Au:Ag     | 237            | 145 ± 20     |

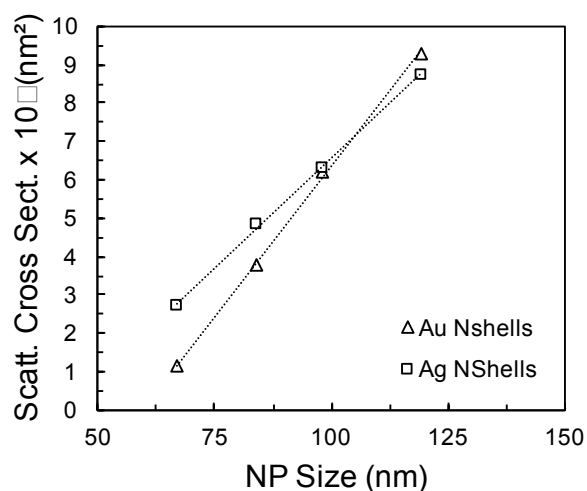

Fig. S1 (A) Mie theory simulation of the scattering cross section of Au (Δ) and Ag (□) hollow nanoparticles as function of size with a 11-nm shell thickness.

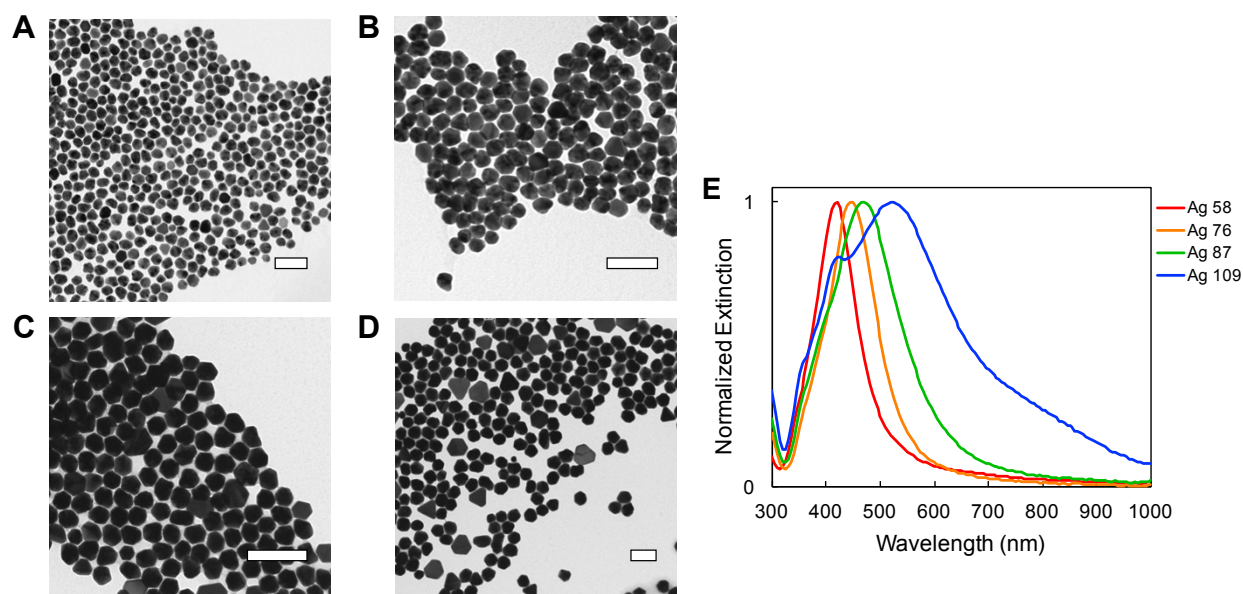

Fig. S2 Ag NPs before formaldehyde-assisted galvanic replacement: (A)  $58 \pm 8$  nm diameter,  $\lambda_{\max} = 430$  nm; (B)  $76 \pm 8$  nm,  $\lambda_{\max} = 450$  nm; (C);  $87 \pm 9$  nm,  $\lambda_{\max} = 475$  nm; (D)  $109 \pm 12$  nm,  $\lambda_{\max} = 520$  nm. Scale bars, 200 nm. (E) Normalized extinction of Ag NPs of sizes shown in A-D.

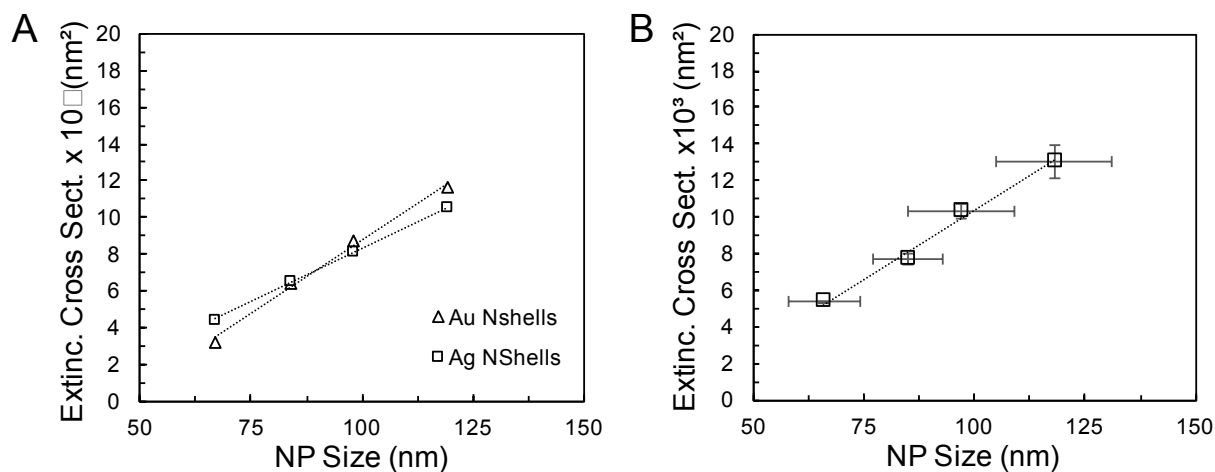

Fig. S3 (A) Mie theory simulation of extinction cross sections for Au ( $\Delta$ ) and Ag ( $\square$ ) hollow nanoparticles as function of size with a 11-nm shell thickness. (B) Experimental extinction cross sections ( $\sigma = \ln(10) D/\rho L$ ), where  $D$  is the optical density,  $\rho$  the number of density in particles/cm<sup>3</sup> and  $L$  the sample length in cm) for the hollow nanoparticles shown in Figure 3.

Table S3. NP size, refractive index sensitivity (RIS), full width at half maximum (FWHM), and sensing figure of merit (FOM) for several hollow NP sizes with 11 nm of shell thickness

| NP Size (nm) | $r_1/(r_2-r_1)$ | RIS (nm/RIU) | FWHM (nm) | FOM |
|--------------|-----------------|--------------|-----------|-----|
| $66 \pm 8$   | 2.1             | 237          | 150       | 1.6 |
| $85 \pm 8$   | 2.7             | 291          | 190       | 1.5 |
| $94 \pm 9$   | 3.1             | 310          | 200       | 1.5 |
| $98 \pm 12$  | 3.5             | 345          | 245       | 1.4 |
| $118 \pm 13$ | 4.6             | 444          | 440       | 1.0 |

Note: Overall performance of the AgAu hollow nanoparticle were compared using figure of merit (FOM) values. FOMs were calculated by dividing the RIS (in nm/RIU) with the FWHM (in nm) of the extinction peak observed in water.

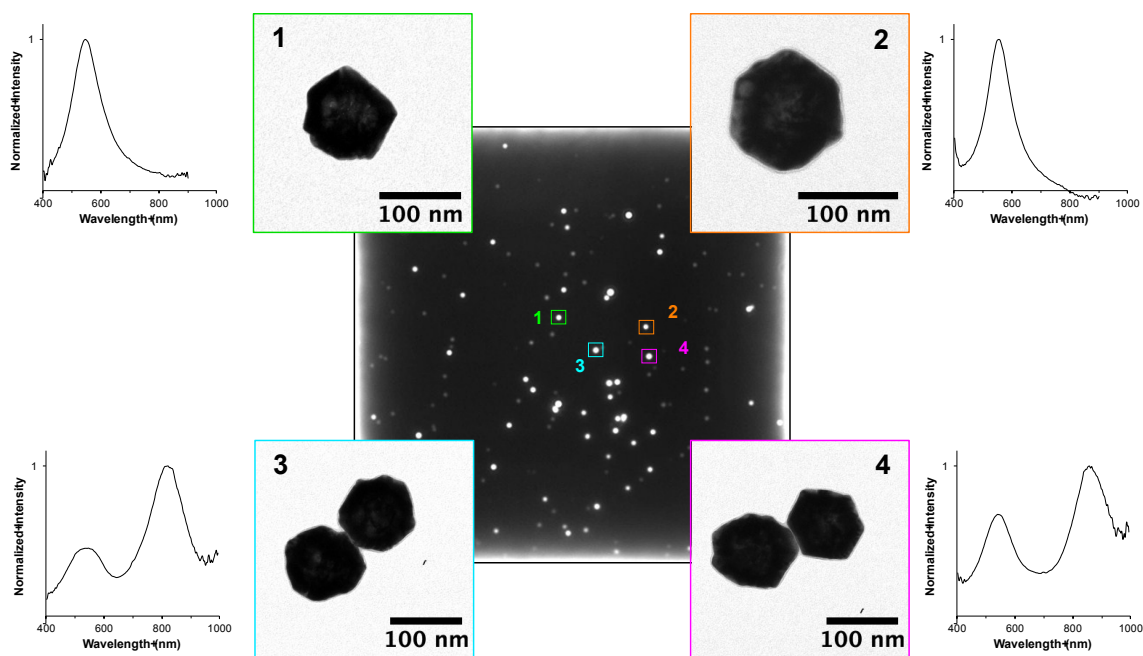

Figure S4. Darkfield optical microscopy image (center) and correlated single NP spectra and TEM images corresponding to the regions indicated in the optical image. This is an example of the single nanoparticle LSPR/TEM correlation performed to validate our data collection technique. Dimers and aggregates were eliminated from data based on the spectrum shape, as assessed by these correlated measurements.
